# Supplementary material for: Enhanced mechanofluorochromic properties of 1,4-dihydropyridine-based fluorescent molecules caused by the introduction of halogen atoms
Source: Royal Society of Chemistry journal article supplement (doi:10.1039/c9ce00348g), 2019-01-01
Supplement: c9ce00348g1.pdf [file c9ce00348g1.pdf]

## Electronic Supplementary Information

### **Enhanced mechanofluorochromic properties of 1,4-dihydropyridine-based fluorescence molecules caused by the introduction of halogen atoms**

Yating Chen, Yibin Zhou, Zhiqiang Wang, Mengzhu Wang, Wenxia Gao, Yunbing Zhou, Miaochang Liu, Xiaobo Huang\* and Huayue Wu\*

College of Chemistry and Materials Engineering, Wenzhou University, Wenzhou, 325035, P. R. China

E-mail: xiaobhuang@wzu.edu.cn (X. Huang), huayuewu@wzu.edu.cn

Contents:

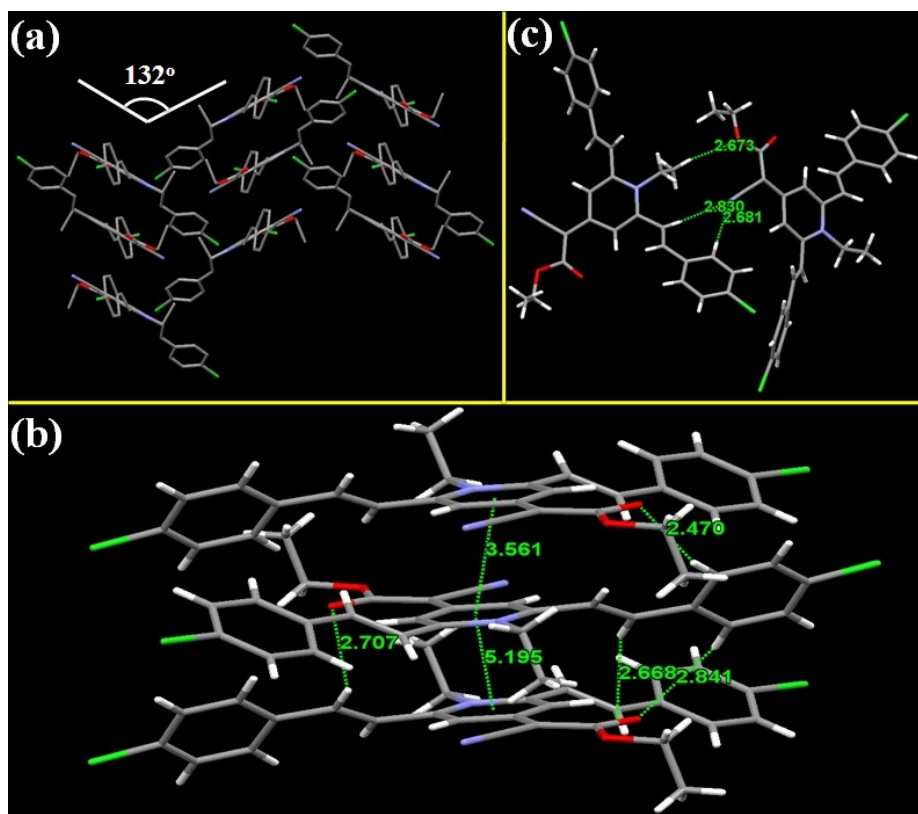

**Fig. S1** Crystal **CMD-Cl**: (a) Molecular packing mode. (b) The C-H...O bond and C-H... $\pi$  bond in the same column. (c) The C-H...O bond and C-H...N bond between different columns.

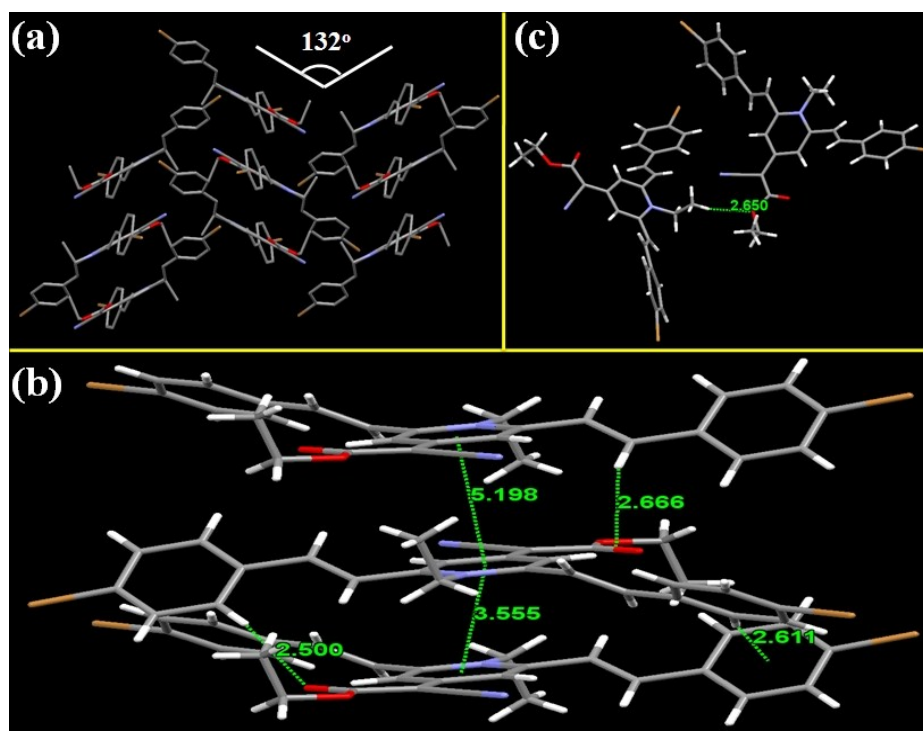

**Fig. S2** Crystal **CMD-Br**: (a) Molecular packing mode. (b) The C-H...O bond and C-H... $\pi$  bond in the same column. (c) The C-H...O bond between different columns.

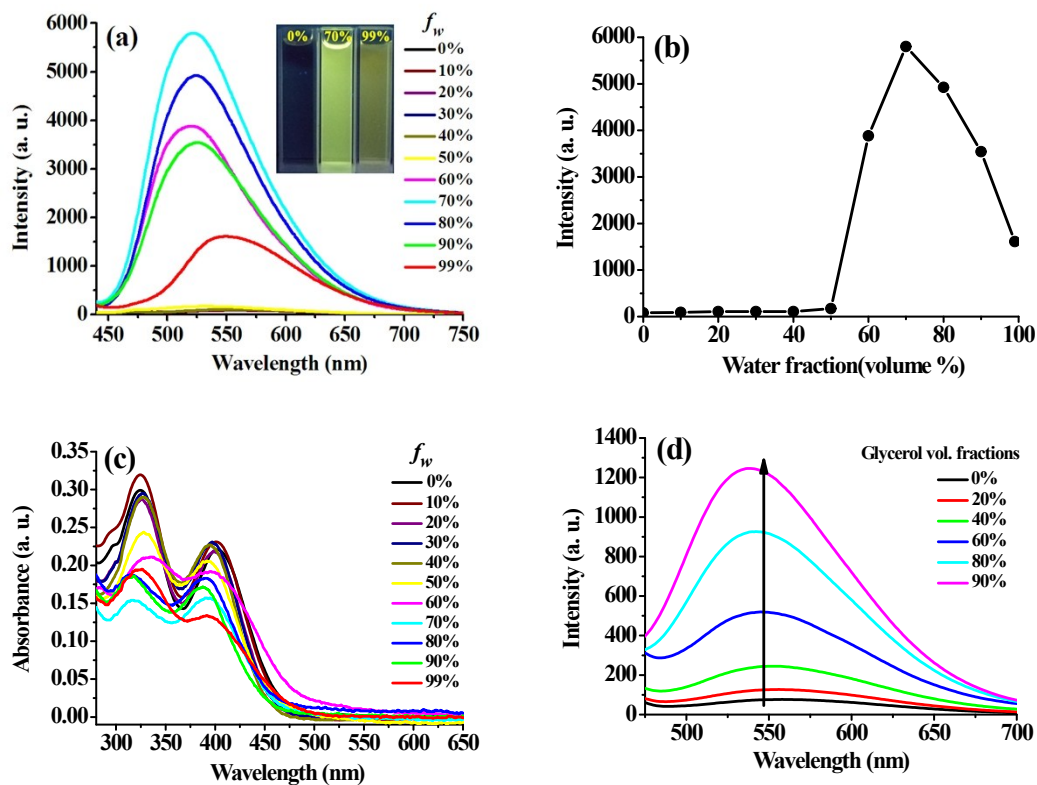

**Fig. S3 CMD-F:** Fluorescence spectra (a), changes in the fluorescence intensity (b), and UV-vis absorption spectra (c) in DMSO-water mixtures (10.0  $\mu\text{mol/L}$ ) with  $f_w$  values from 0 to 99%. Fluorescence spectra (d) in DMSO-glycerol mixtures (10.0  $\mu\text{mol/L}$ ) with the glycerol volume fraction from 0 to 90%. The insets in (a) show digital photographs of the fluorescence of mixtures with  $f_w = 0$ , 70, and 99%.

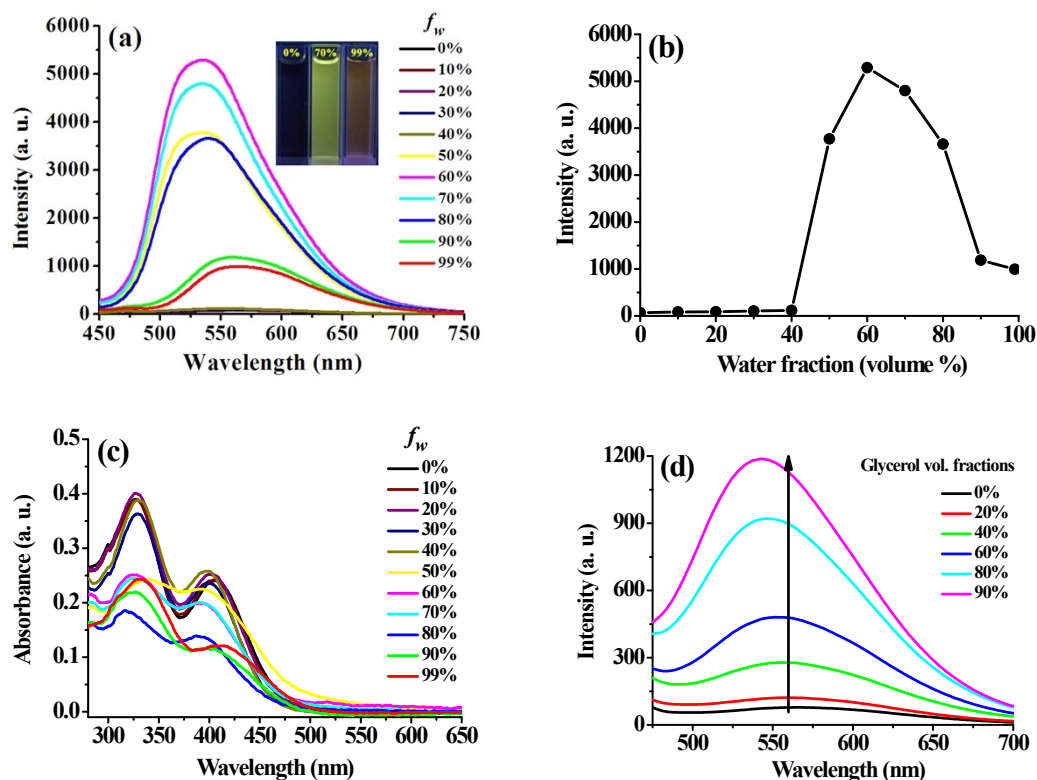

**Fig. S4 CMD-CI:** Fluorescence spectra (a), changes in the fluorescence intensity (b), and UV-vis absorption spectra (c) in DMSO-water mixtures (10.0  $\mu\text{mol/L}$ ) with  $f_w$  values from 0 to 99%. Fluorescence spectra (d) in DMSO-glycerol mixtures (10.0  $\mu\text{mol/L}$ ) with the glycerol volume fraction from 0 to 90%. The insets in (a) show digital photographs of the fluorescence of mixtures with  $f_w = 0, 70$ , and 99%.

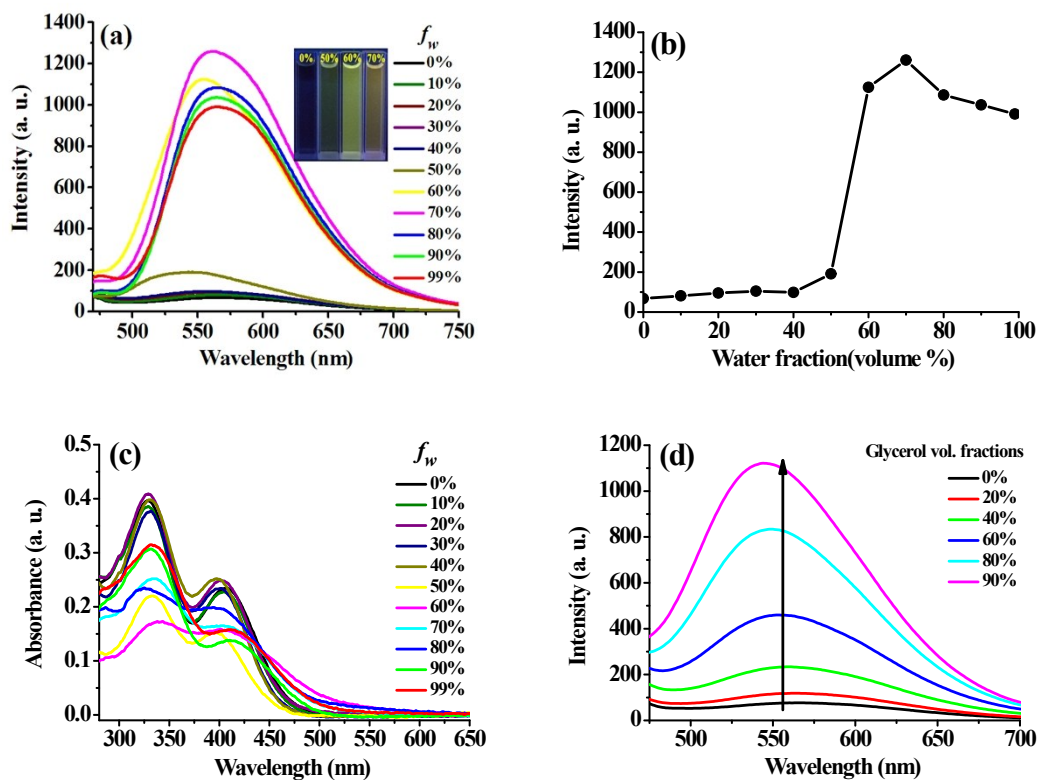

**Fig. S5 CMD-Br:** Fluorescence spectra (a), changes in the fluorescence intensity (b), and UV-vis absorption spectra (c) in DMSO-water mixtures (10.0  $\mu\text{mol/L}$ ) with  $f_w$  values from 0 to 99%. Fluorescence spectra (d) in DMSO-glycerol mixtures (10.0  $\mu\text{mol/L}$ ) with the glycerol volume fraction from 0 to 90%. The insets in (a) show digital photographs of the fluorescence of mixtures with  $f_w = 0, 50, 60,$  and  $70\%$ .

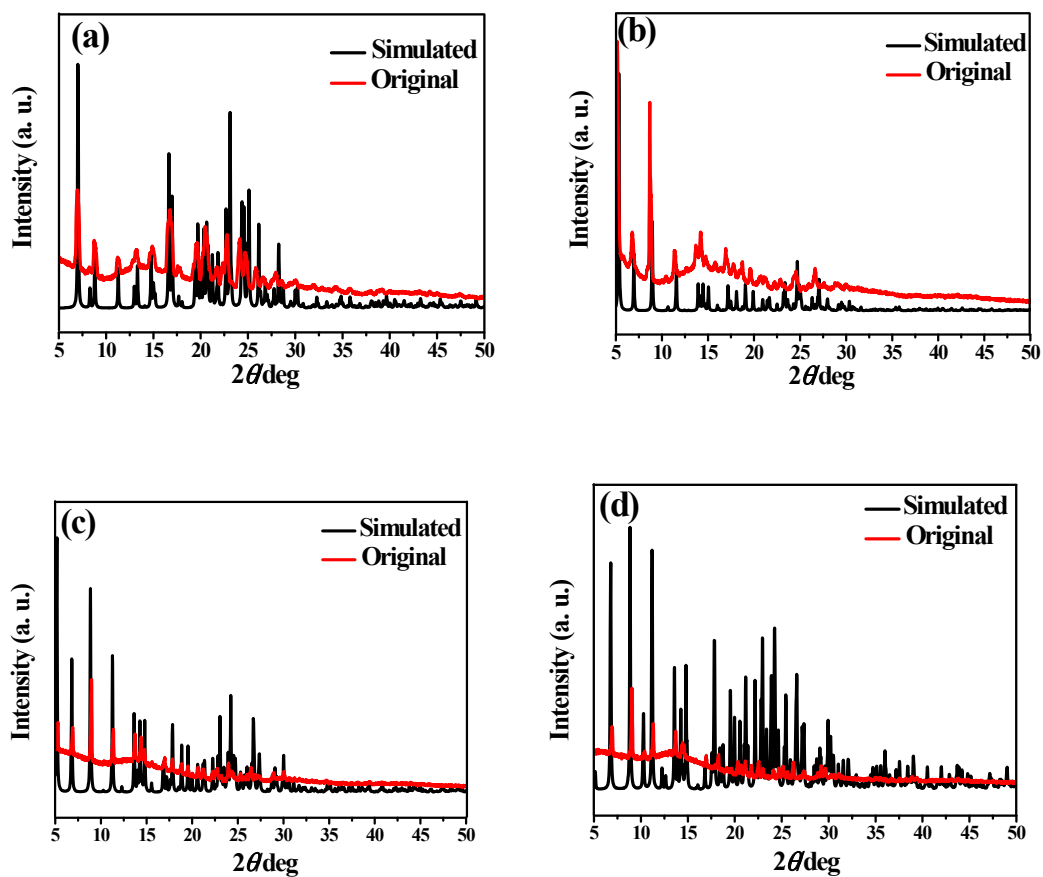

**Fig. S6** Comparison of XRD curves of the original samples of the CMD derivatives and the simulated XRD curves obtained from the corresponding single crystals: **CMD-H** (a), **CMD-F** (b), **CMD-Cl** (c), and **CMD-Br** (d).

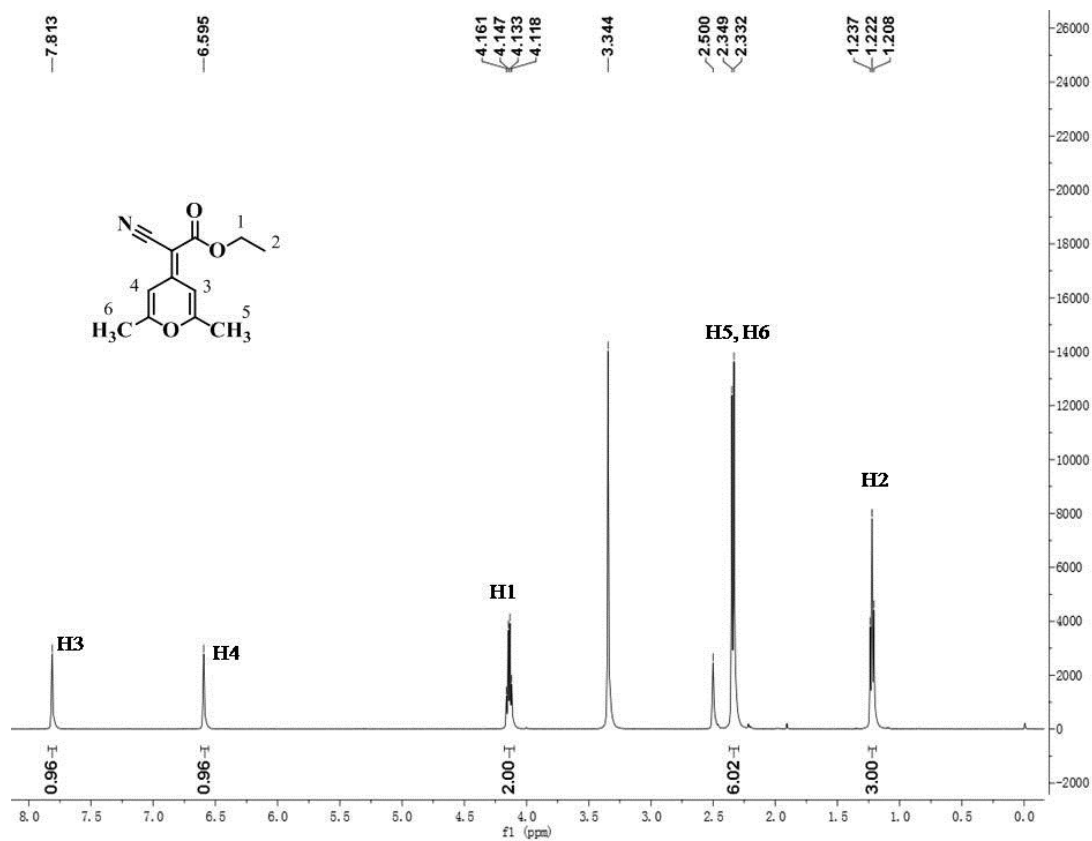

Fig. S7 <sup>1</sup>H NMR of compound 2 (DMSO-*d*<sub>6</sub>, 500 MHz).

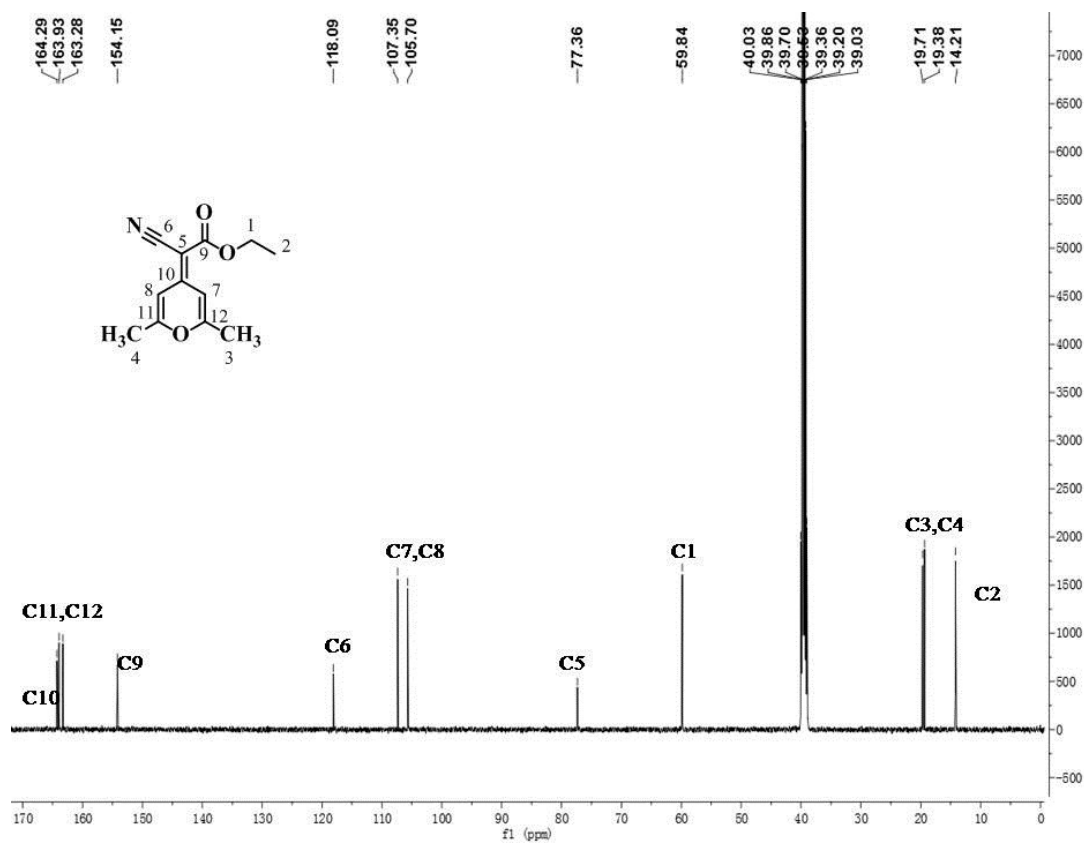

Fig. S8 <sup>13</sup>C NMR of compound 2 (DMSO-*d*<sub>6</sub>, 125 MHz).

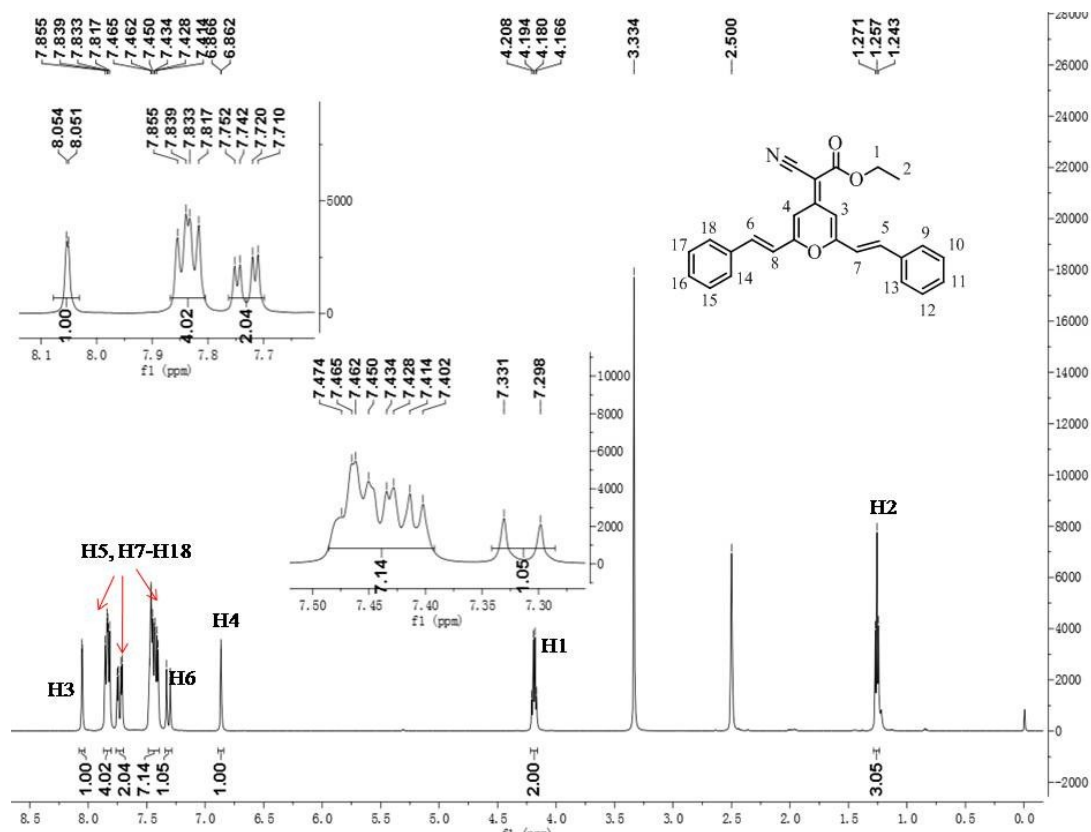

Fig. S9 <sup>1</sup>H NMR of compound 3a (DMSO-*d*<sub>6</sub>, 500 MHz).

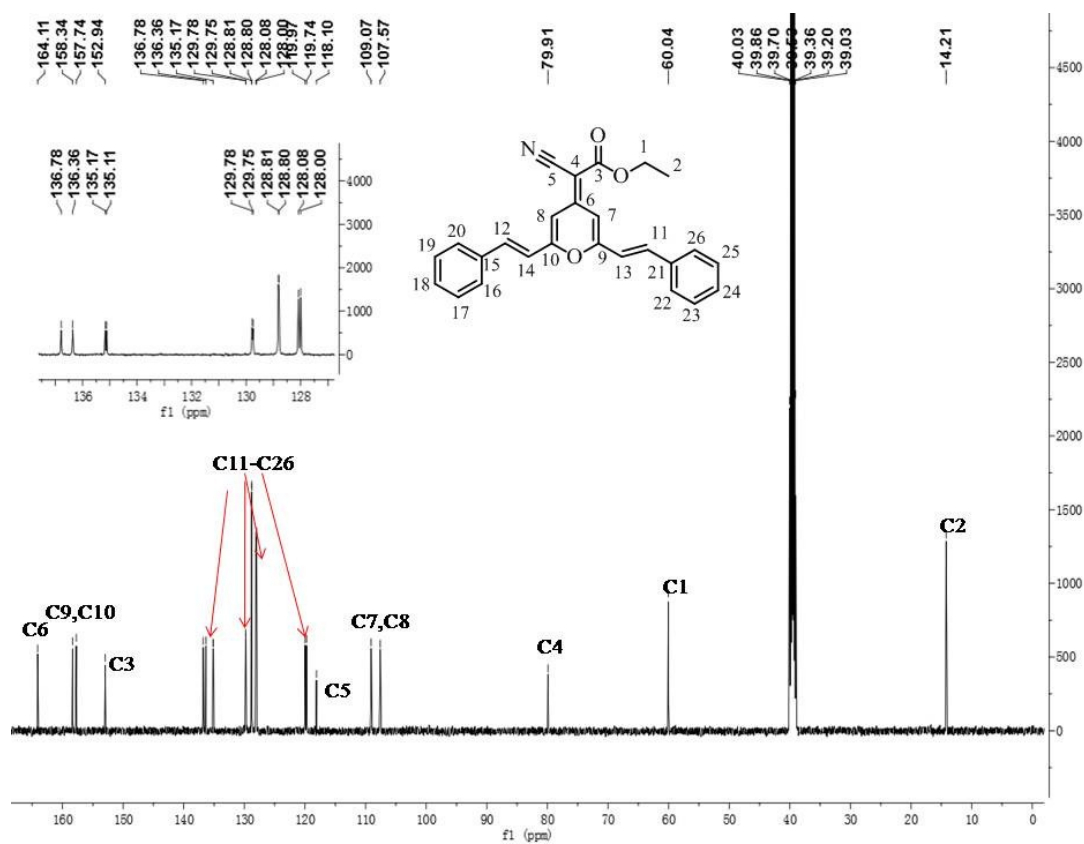

Fig. S10 <sup>13</sup>C NMR of compound 3a (DMSO-*d*<sub>6</sub>, 125 MHz).



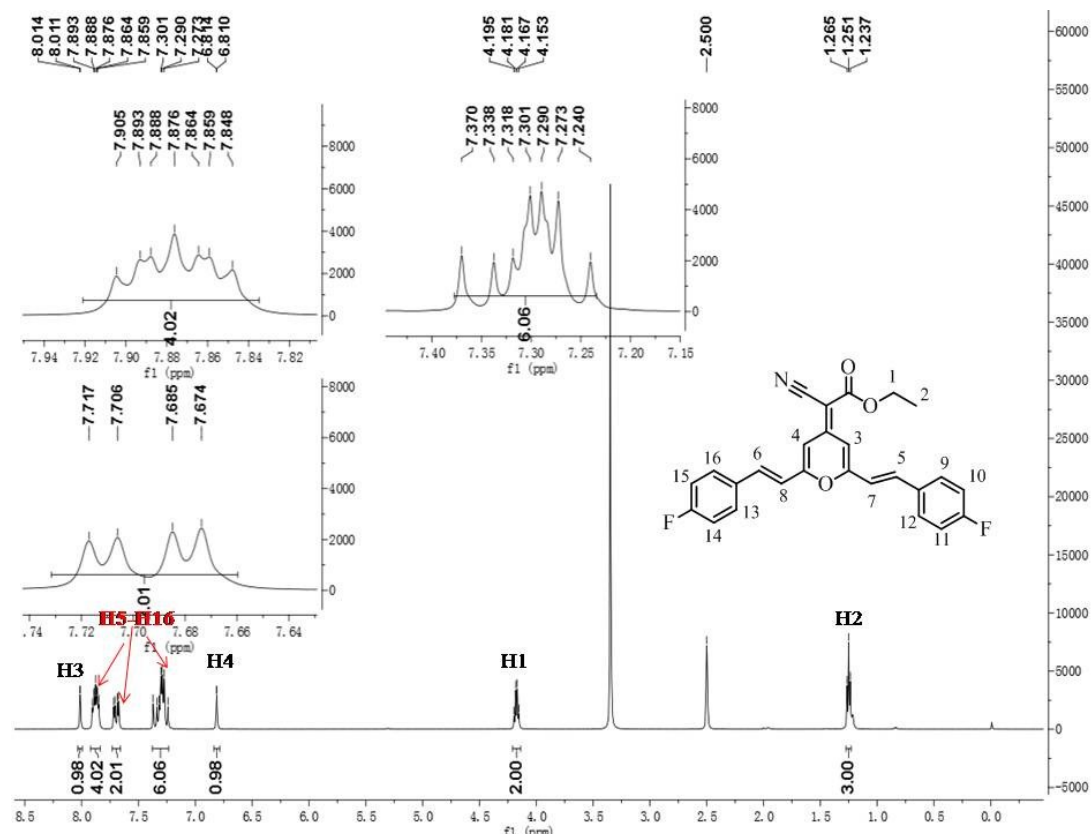

Fig. S11 <sup>1</sup>H NMR of compound 3b (DMSO-*d*<sub>6</sub>, 500 MHz).

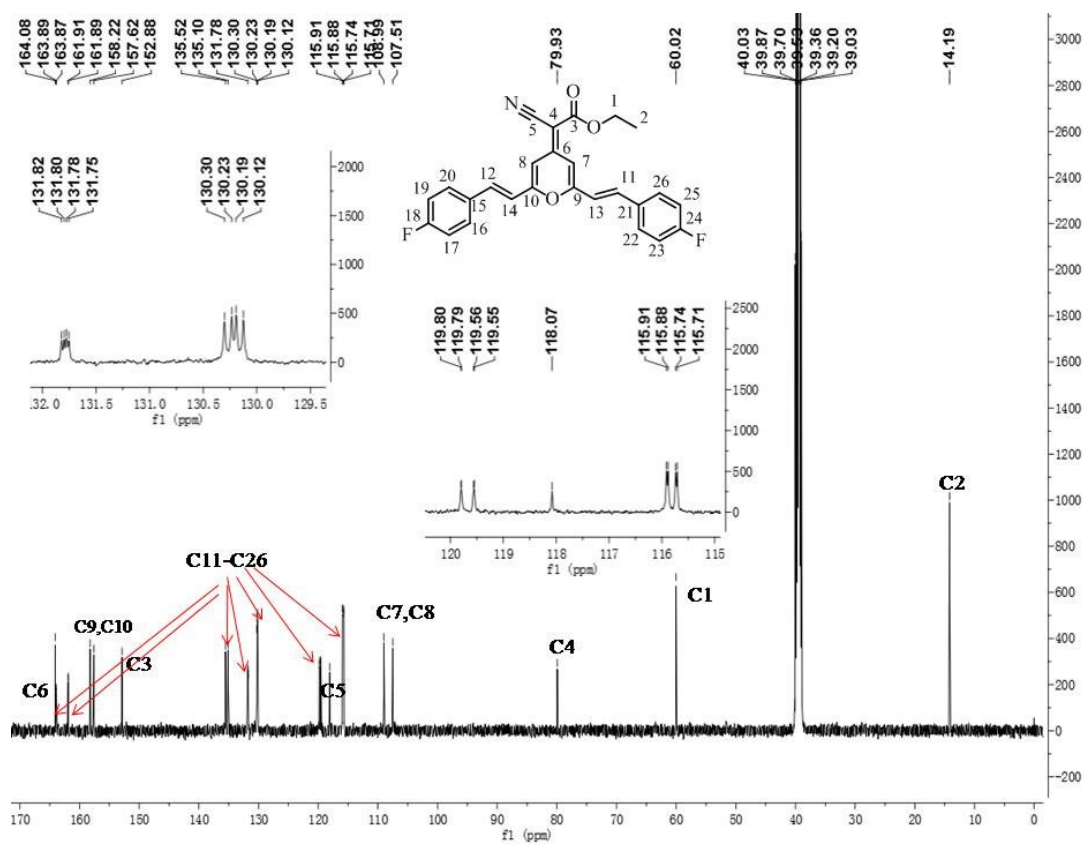

Fig. S12 <sup>13</sup>C NMR of compound 3b (DMSO-*d*<sub>6</sub>, 125 MHz).

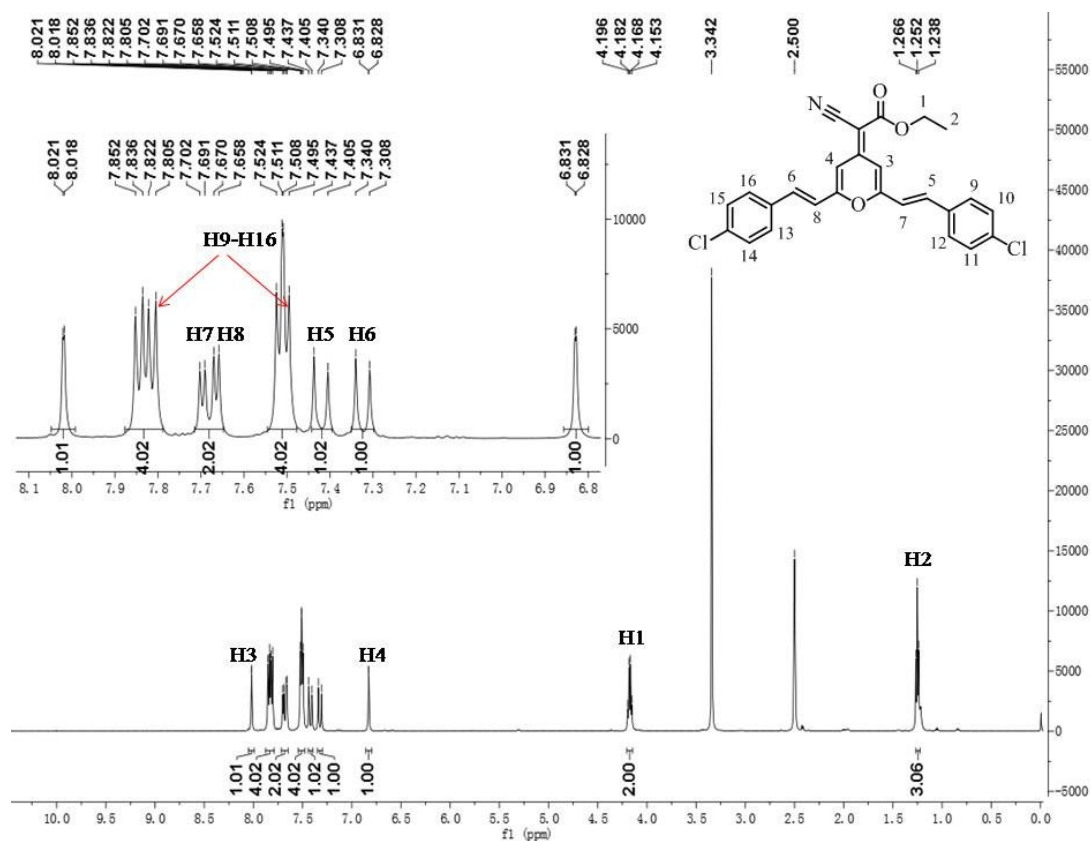

Fig. S13 <sup>1</sup>H NMR of compound 3c (DMSO-*d*<sub>6</sub>, 500 MHz).

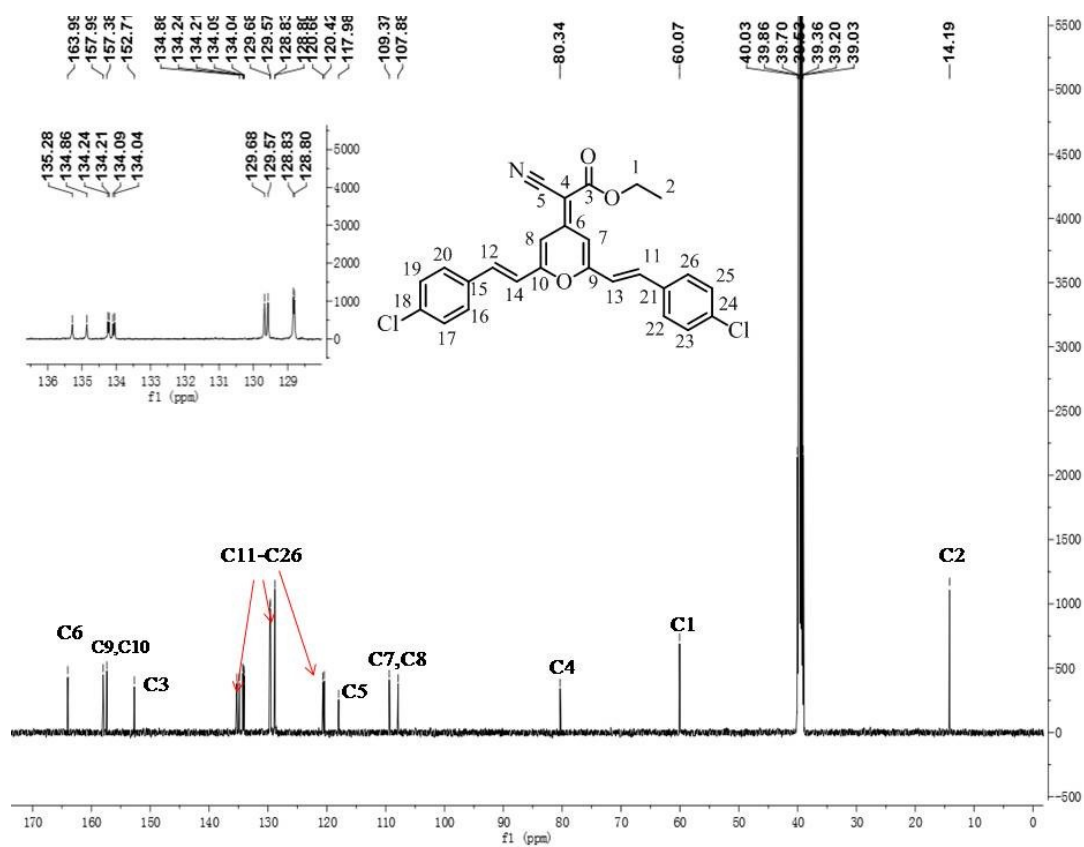

Fig. S14 <sup>13</sup>C NMR of compound 3c (DMSO-*d*<sub>6</sub>, 125 MHz).

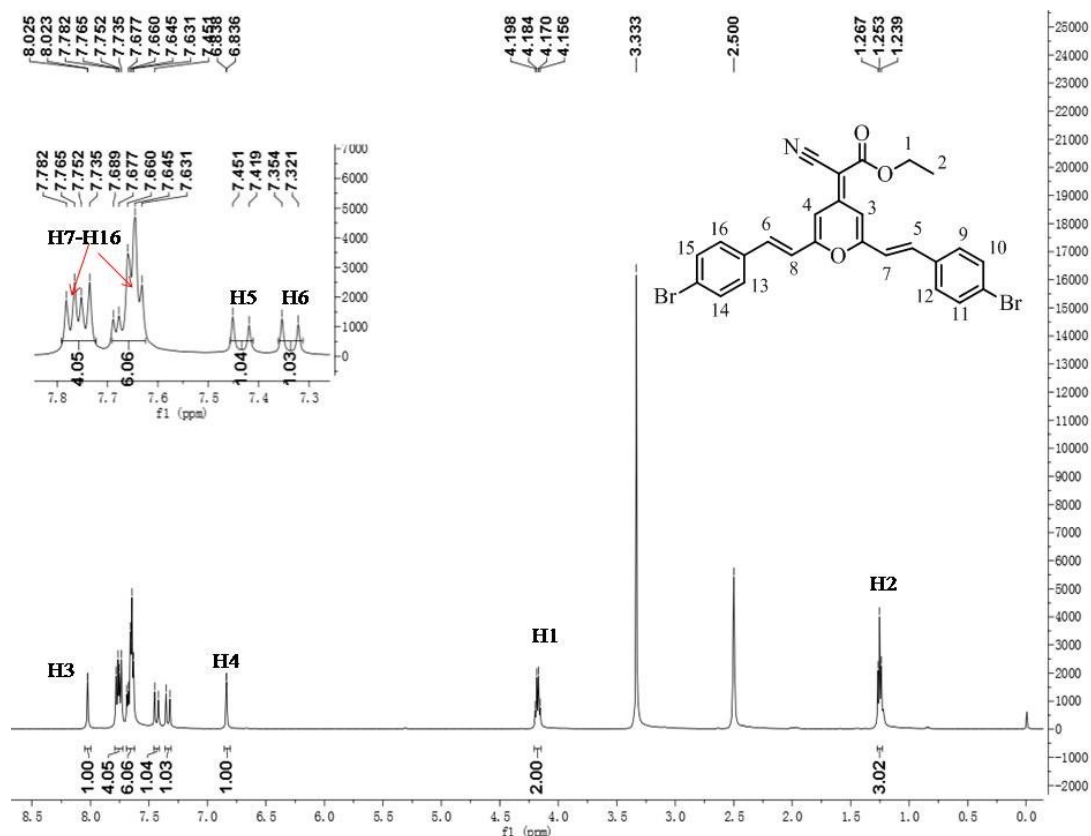

Fig. S15  $^1\text{H}$  NMR of compound 3d (DMSO- $d_6$ , 500 MHz).

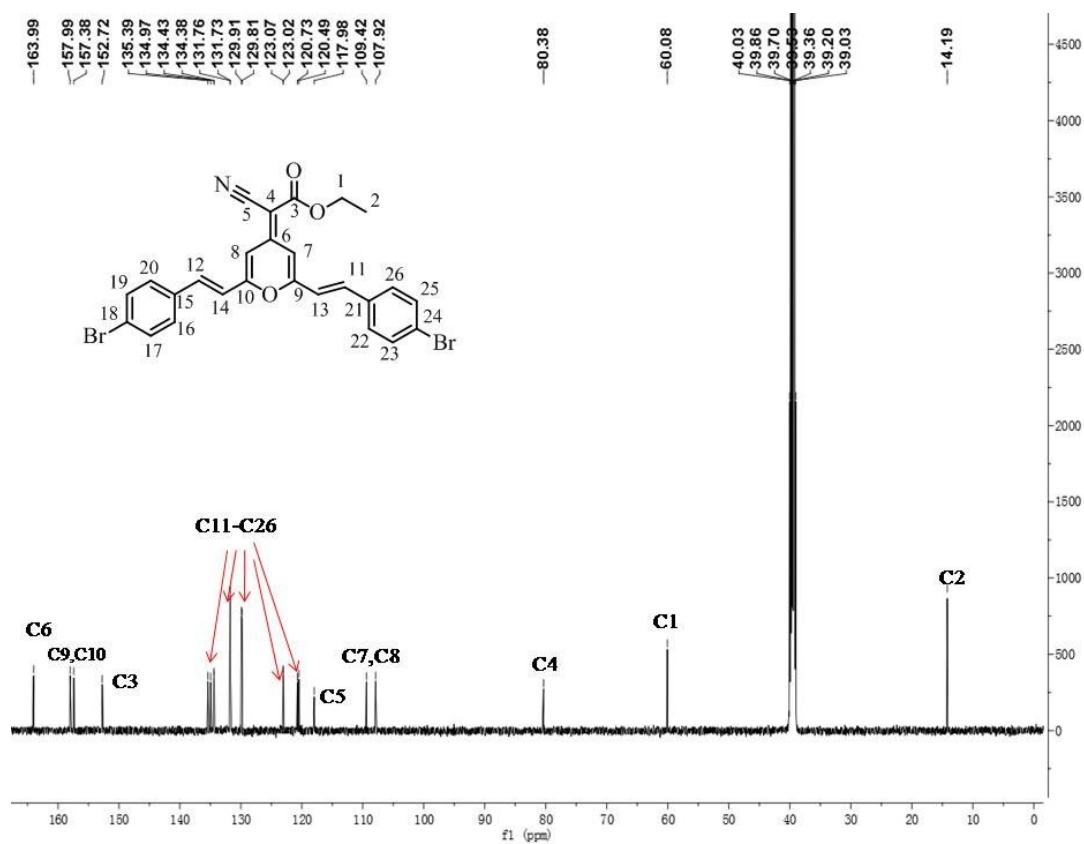

Fig. S16  $^{13}\text{C}$  NMR of compound 3d (DMSO- $d_6$ , 125 MHz).

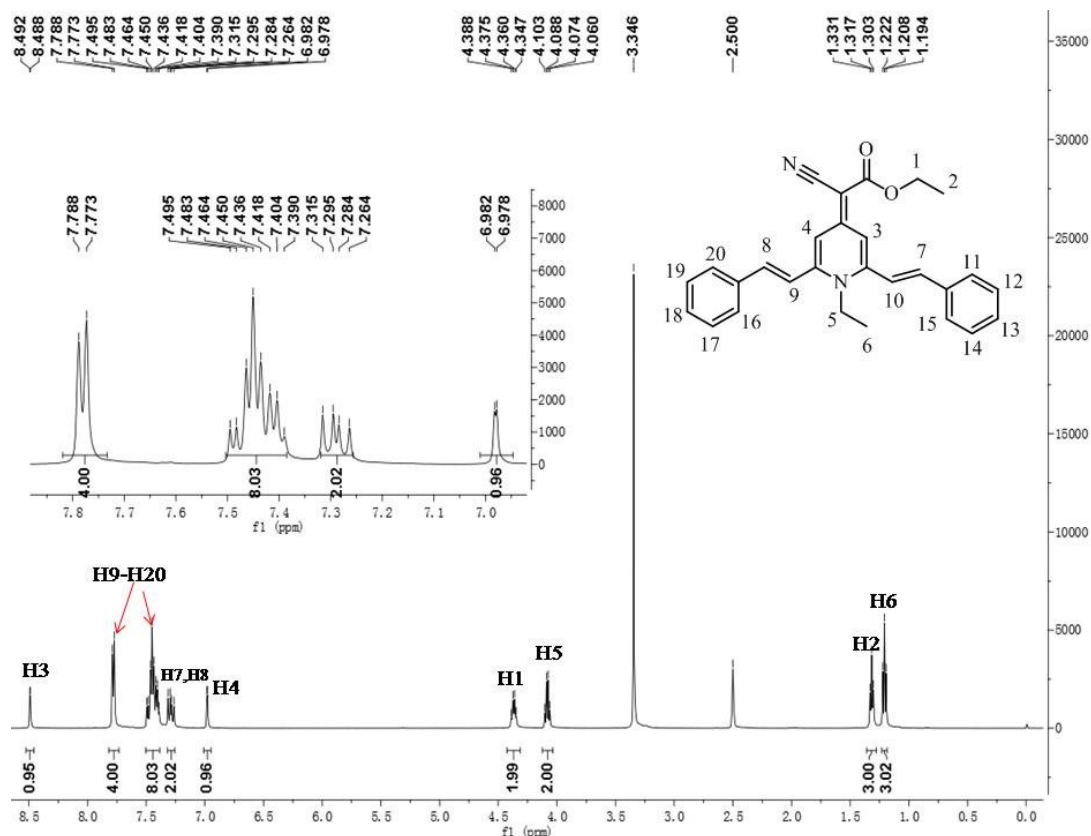

Fig. S17  $^1\text{H}$  NMR of CMD-H (DMSO- $d_6$ , 500 MHz).

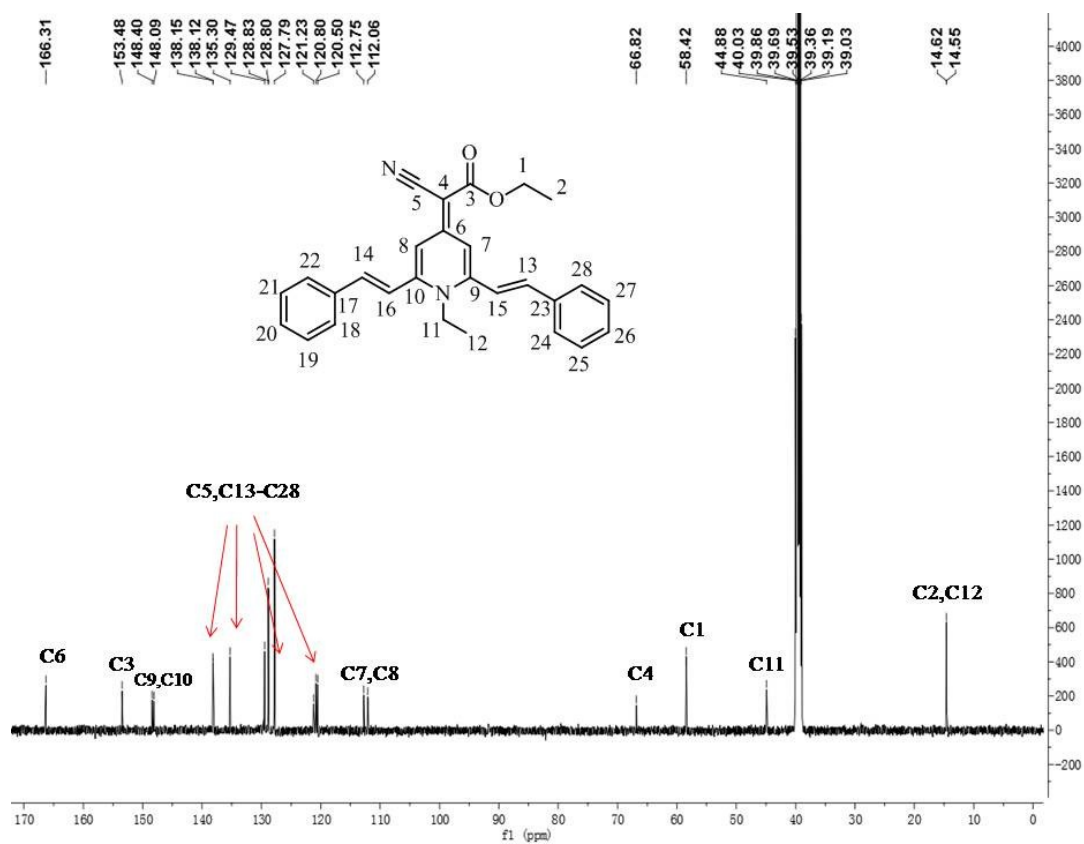

Fig. S18  $^{13}\text{C}$  NMR of CMD-H (DMSO- $d_6$ , 125 MHz).

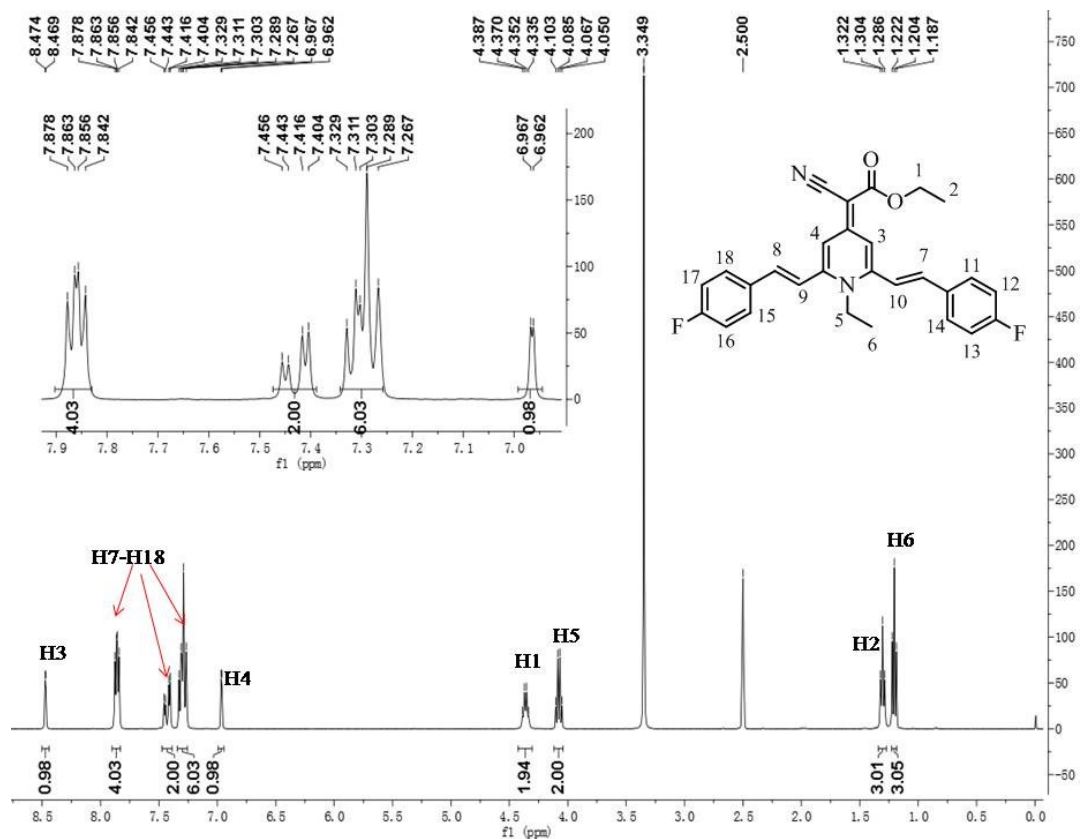

Fig. S19 <sup>1</sup>H NMR of CMD-F (DMSO-*d*<sub>6</sub>, 400 MHz).

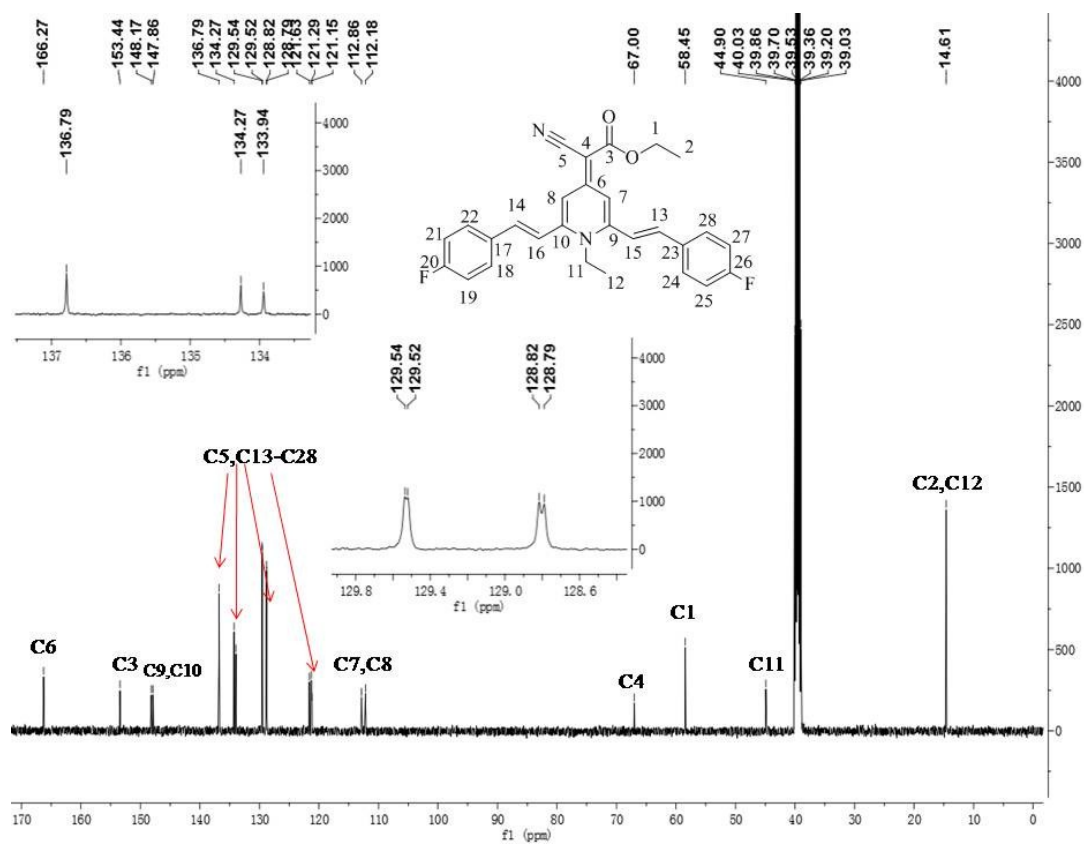

Fig. S20 <sup>13</sup>C NMR of CMD-F (DMSO-*d*<sub>6</sub>, 125 MHz).

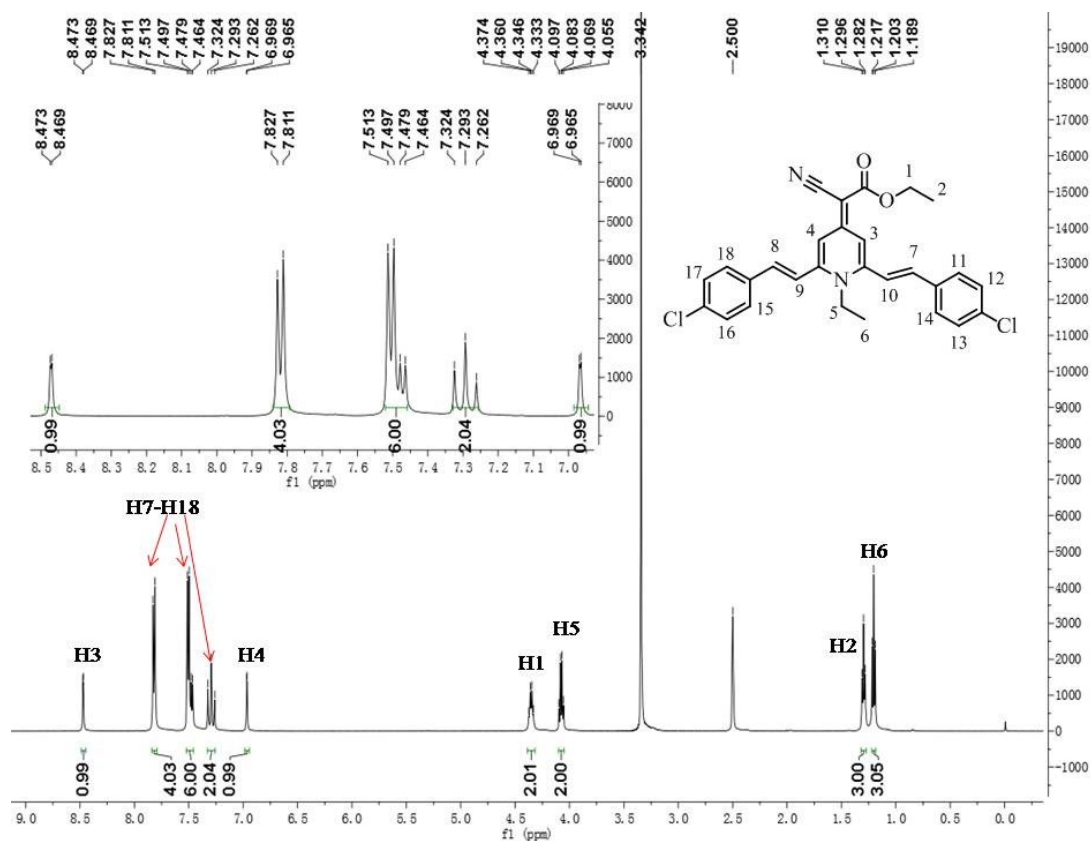

Fig. S21 <sup>1</sup>H NMR of CMD-Cl (DMSO-*d*<sub>6</sub>, 500 MHz).

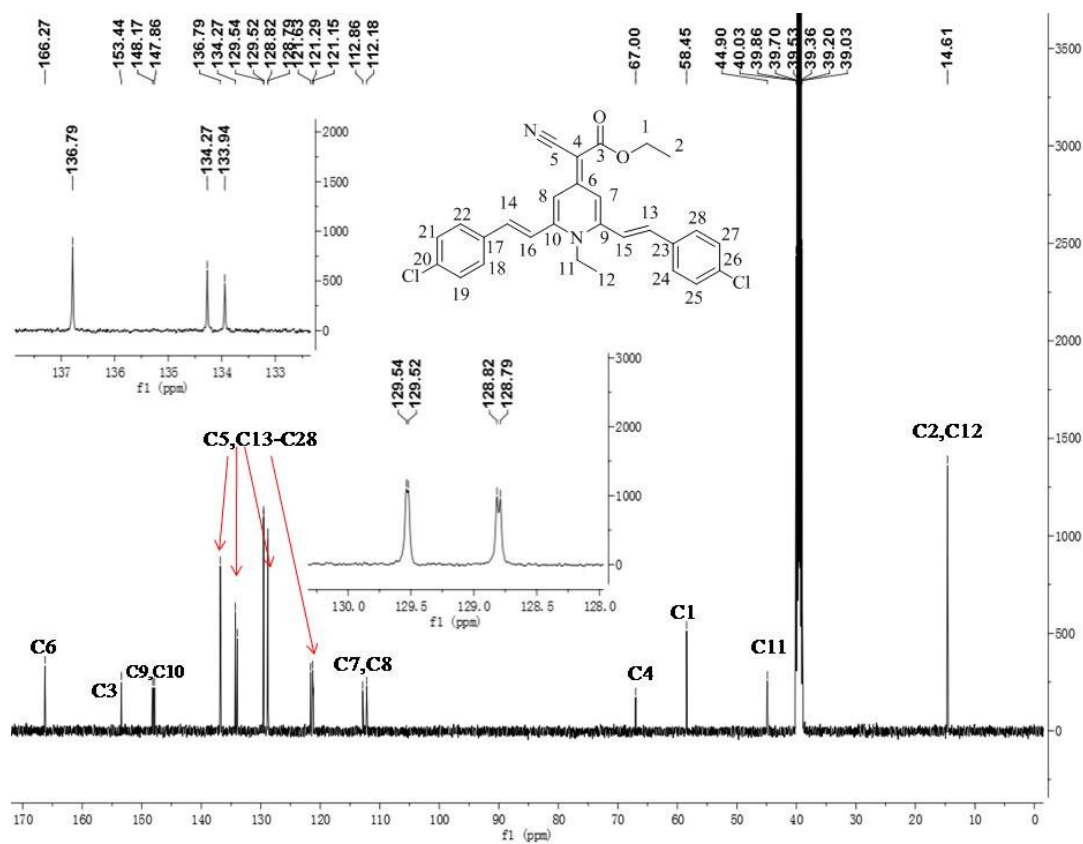

Fig. S22 <sup>13</sup>C NMR of CMD-Cl (DMSO-*d*<sub>6</sub>, 125 MHz).



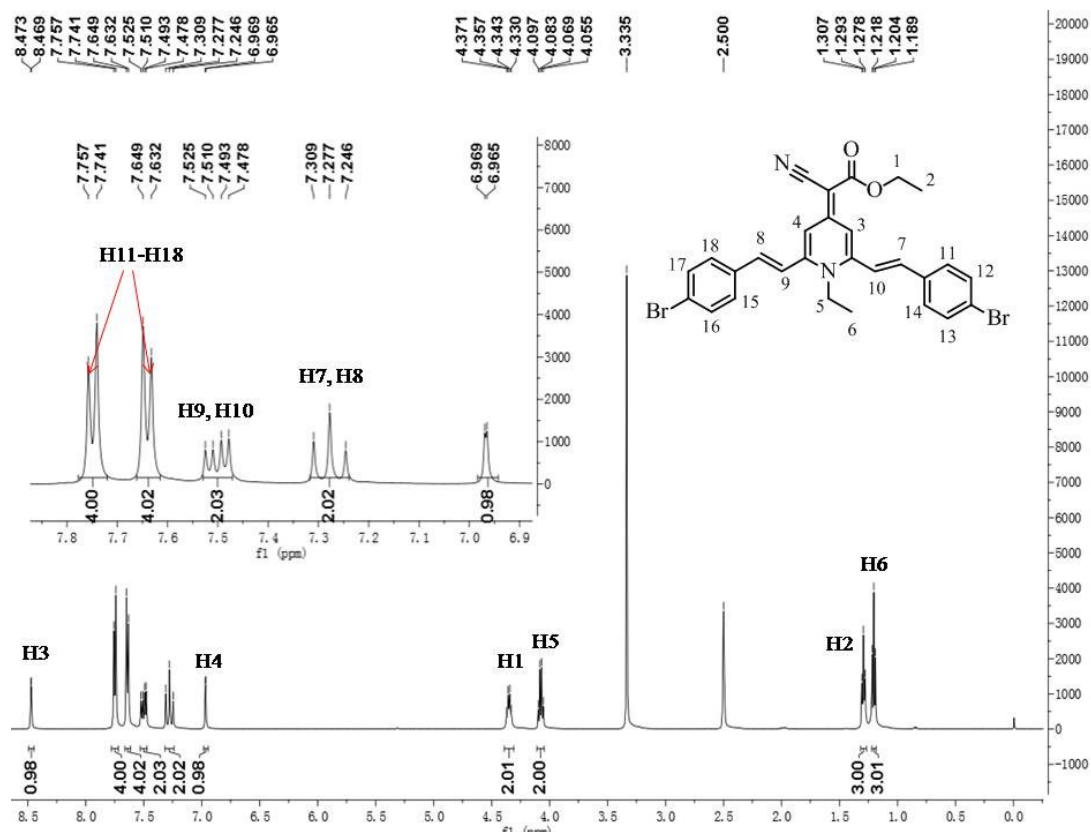

Fig. S23 <sup>1</sup>H NMR of CMD-Br (DMSO-*d*<sub>6</sub>, 500 MHz).

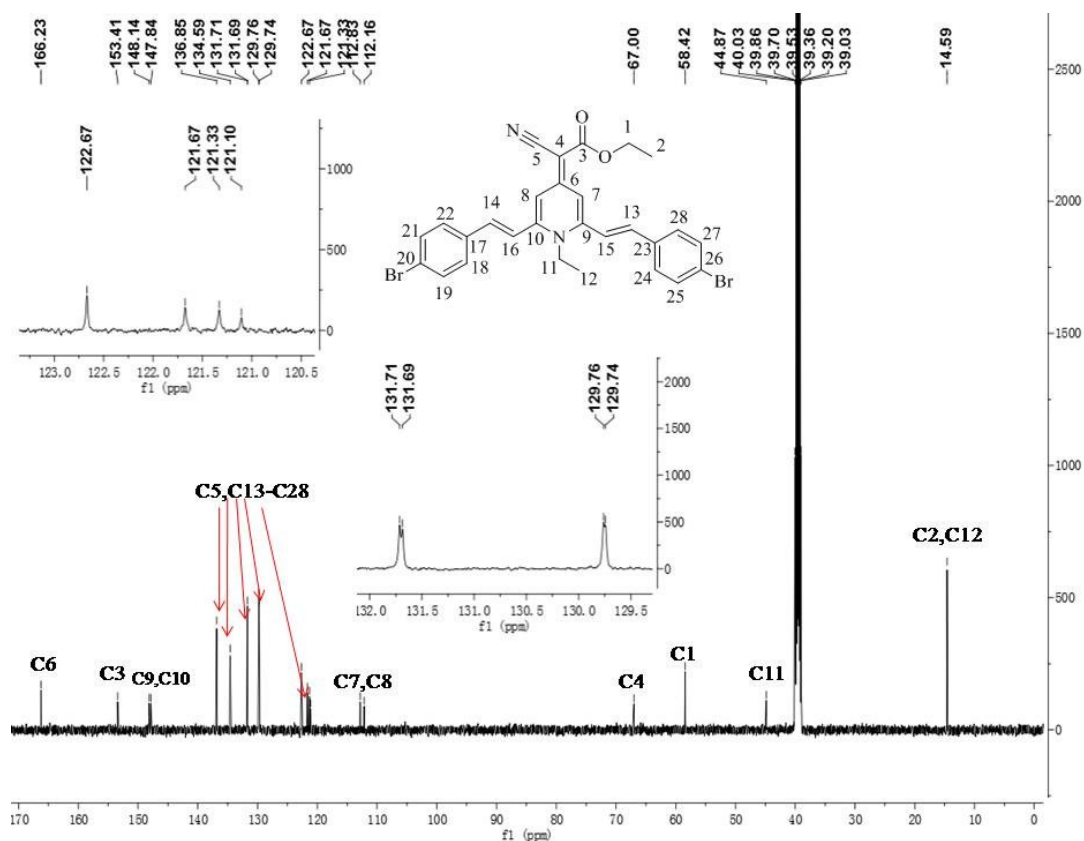

Fig. S24 <sup>13</sup>C NMR of CMD-Br (DMSO-*d*<sub>6</sub>, 125 MHz).
